# Supplementary material for: Wie Stillen in der Praxis gelingt
Source: Springer Nature journal article supplement (doi:10.1007/s43877-023-0812-3), 2023-09-01
Supplement: MOESM1 [file 26026392]

## Literaturliste

zum Beitrag „Wie Stillen in der Praxis gelingt“

von Verena Bossung & Franziska Krähenmann

HebammenWissen (4) 5/2023, S. 40–44

Centers for Disease Control and Prevention (2023) Clinical Considerations for Mpox in People Who are Pregnant or Breastfeeding.

<https://tinyurl.com/yv64s99a> (letzter Zugriff: 4.8.2023)

Dashraath P et al (2022) Monkeypox in pregnancy: virology, clinical presentation, and obstetric management. Am J Obstet Gynecol 227(6):849–861.e1

HIV-Therapie in der Schwangerschaft und bei HIV-exponierten Neugeborenen. S2k-Leitlinie. AWMF-Nr. 055/022; 2020

Kornfeld H et al. (2021) Management of Infected Galactocele and Breast Implant with Uninterrupted Breastfeeding. Plast Reconstr Surg Glob Open 9(11):e3943

Koschinski-Möller B (2021) Raynaud's Phenomenon in the Breast Nipple Area. Dtsch Arztebl 118:605

Mitchell KB et al. (2022) Academy of Breastfeeding Medicine Clinical Protocol #36: The Mastitis Spectrum, Revised 2022. Breastfeed Med 17(5):360–376

Parker MG et al. (2021) Promoting Human Milk and Breastfeeding for the Very Low Birth Weight Infant. Pediatrics 148(5):e2021054272

SARS-CoV-2 in Schwangerschaft, Geburt und Wochenbett. S2k-Leitlinie. AWMF-Nr. 015/092; 2022

Therapie entzündlicher Brusterkrankungen in der Stillzeit. S3-Leitlinie. AWMF-Nr. 015/071; 2013
