# Supplementary material for: Wie Stillen in der Praxis gelingt
Source: Springer Nature journal article supplement (doi:10.1007/s43877-023-0812-3), 2023-09-01
Supplement: MOESM2 [file 26026392]

## Tabelle 2

### zum Beitrag „Wie Stillen in der Praxis gelingt“

von Verena Bossung & Franziska Krähenmann

HebammenWissen (4) 5/2023, S. 40–44

Tab. 2: Online-Informationen rund ums Stillen

| <b>Webseite</b>      | <b>Betreiber</b>                                                        | <b>Informationsart</b>                                                            |
|----------------------|-------------------------------------------------------------------------|-----------------------------------------------------------------------------------|
| Embryotox.de         | Pharmakovigilanz- und Beratungszentrum für Embryonaltoxikologie, Berlin | Informationen zu Medikamenten in Schwangerschaft und Stillzeit                    |
| LactMed              | Drugs and Lactation Database, National Library of Medicine, USA         | Information zu Medikamenten in der Stillzeit (insbesondere auch neuere Präparate) |
| Bfmed.org            | Academy of Breastfeeding Medicine                                       | Aktuelle Leitlinien und Therapieprotokolle                                        |
| Stillen-Institut.com | Europäisches Institut für Stillen und Laktation                         | Fachinformationen und praxisnahe Empfehlungen                                     |
| Gesund-ins-Leben.de  | Bundesamt für Landwirtschaft und Ernährung                              | Informationsmaterial für Patientinnen und Fachkreise                              |
